## Molecular evidence for color discrimination in the Atlantic sand fiddler crab, *Uca pugilator*

Premraj Rajkumar<sup>1</sup>, Stephanie M. Rollmann<sup>1</sup>, Tiffany A. Cook<sup>2</sup> and John E. Layne<sup>1,\*</sup>

<sup>1</sup>Department of Biological Sciences, University of Cincinnati, Cincinnati, Ohio 45221, USA, <sup>2</sup>Division of Developmental Biology and Department of Pediatric Ophthalmology, Cincinnati Children's Hospital Medical Center, Cincinnati, Ohio 45229, USA

\*Author for correspondence (john.layne@uc.edu)

Accepted 22 September 2010

### SUMMARY

Fiddler crabs are intertidal brachyuran crabs that belong to the genus *Uca*. Approximately 97 different species have been identified, and several of these live sympatrically. Many have species-specific body color patterns that may act as signals for intra- and interspecific communication. To understand the behavioral and ecological role of this coloration we must know whether fiddler crabs have the physiological capacity to perceive color cues. Using a molecular approach, we identified the opsin-encoding genes and determined their expression patterns across the eye of the sand fiddler crab, *Uca pugilator*. We identified three different opsin-encoding genes (*UpRh1*, *UpRh2* and *UpRh3*). *UpRh1* and *UpRh2* are highly related and have similarities in their amino acid sequences to other arthropod long- and medium-wavelength-sensitive opsins, whereas *UpRh3* is similar to other arthropod UV-sensitive opsins. All three opsins are expressed in each ommatidium, in an opsin-specific pattern. *UpRh3* is present only in the R8 photoreceptor cell, whereas *UpRh1* and *UpRh2* are present in the R1–7 cells, with *UpRh1* expression restricted to five cells and *UpRh2* expression present in three cells. Thus, one photoreceptor in every ommatidium expresses both *UpRh1* and *UpRh2*, providing another example of sensory receptor coexpression. These results show that *U. pugilator* has the basic molecular machinery for color perception, perhaps even trichromatic vision.

Key words: color vision, photoreceptor, visual pigment, rhodopsin, *Uca pugilator*, fiddler crab.

### INTRODUCTION

Animal coloration has long been implicated in intraspecific signaling (Darwin, 1871), particularly in the context of sexual selection and mate choice. Not surprisingly, the ability to visually distinguish colors has been found to be a major sensory cue for these behavioral and ecological functions in many species [e.g. primates (Fernandez and Morris, 2007), spiders (Lim et al., 2008), cichlids (Seehausen et al., 2008), crabs (Baldwin and Johnsen, 2009), stomatopods (Cheroske et al., 2009) and frogs (Sztatecsny et al., 2010)]. Research using fiddler crabs (genus *Uca*) has provided several insights into the mechanisms of intraspecific visual signaling and communication, but this work has generally focused on form and motion cues or, if it involved the manipulation of color, could not rule out achromatic contrast as a confounding visual cue (for reviews, see Crane, 1975; Salmon and Hyatt, 1983; Christy and Salmon, 1984; Salmon, 1984; Salmon and Zucker, 1988; Christy and Salmon, 1991; Backwell and Passmore, 1996; Koga et al., 1998; Backwell et al., 1999; Backwell et al., 2000; Christy et al., 2001; Murai and Backwell, 2005; Christy and Backwell, 2006; How et al., 2008). To summarize a few salient findings, the males' claw-waving displays attract the attention of females, and because the waves' spatial and dynamic aspects are species specific, it probably also communicates species identity (Aspey, 1971; How et al., 2009). The conspicuousness of this display is aided by the enhanced visual contrast of the carapace and major cheliped against a mud background, provided by their particular spectral reflectance, which can even change to maintain high contrast after a change in background (Zeil and Zanker, 1997; Zeil and Hofmann, 2001; Zeil and Hemmi, 2006). When female *U. mjoebergi* and *U. signata* were given a choice between hetero- and conspecific males

with painted chelae they preferred whichever one was painted to resemble a conspecific male (Detto et al., 2006).

Only a few behavioral experiments have been specifically designed to test for color vision in fiddler crabs, and these have been fairly successful. Female *U. pugilator* showed positive phototaxis towards monochromatic blue and red–orange light, but not towards white light (Hyatt, 1974). Recently, when *U. mjoebergi* females were subjected to a choice between males having a yellow claw and males whose claws had been painted one of several shades of grey, they preferred the yellow claw, suggesting that mere luminosity does not mediate the discrimination (Detto, 2007). Thus, for *U. mjoebergi*, coloration does not merely increase luminance contrast, but is a real color signal in both visible and ultraviolet wavelengths (Detto and Backwell, 2009).

Despite the evidence for color vision from behavioral studies, attempts to demonstrate color vision physiologically have yielded mixed results. In an early attempt, glass electrode electroretinograms (ERG) on *U. pugilator*, *U. pugnax* and *U. minax* produced broad spectral sensitivity curves with maxima between 450 and 500 nm, predicting at least two pigments with one sensitive in blue–violet and the other in red–orange (Hyatt, 1974). This contradicted results published in the same year from cotton wick ERGs from *U. pugilator* and *U. pugnax*, which showed an absorption curve with only a single peak at ~508 nm (Scott and Mote, 1974). Both studies also included selective adaptation of photopigments with monochromatic light, and both studies reported results that supported their opposing conclusions from the ERG amplitudes, adding to the confusion over whether these species have one or more visual pigments. Much later, action potentials recorded from the optic nerve of *U. thayeri* showed broad spectral response curves that were best fit by two visual

Table 1. Primers used to sequence *U. pugilator* opsins

| Primer name     | Primer description | Sequence (5'→3')                        | Melting point (°C) |
|-----------------|--------------------|-----------------------------------------|--------------------|
| F5              | Degenerate (LW)    | GCG AAT TCC GSG ANC ARG CMA ARA RRW TG  | 59.6               |
| R8              | Degenerate (LW)    | CGG GAT CCD AYR SMR TAN ACR AWW GG      | 51.9               |
| UpDF1           | Degenerate (SW)    | CAT GTT CAT CAT CAA CCT GGC VAW RAA CC  | 58.5               |
| Hybrid dT       | Specific (3'RACE)  | GAC TCG AGT CGA CAT CGA TTT TTT TTT TTT | 57.4               |
| Adapter R       | Specific (3'RACE)  | GAC TCG AGT CGA CAT CG                  | 52.2               |
| <i>UpRh1</i> R1 | Specific (5'RACE)  | ACA TTG GAT TCA CGG GAG CGT AGT         | 60.3               |
| <i>UpRh2</i> R1 | Specific (5'RACE)  | TTA GCT TCA AAC GGC TTG GCG ATG         | 60.2               |
| <i>UpRh3</i> R1 | Specific (5'RACE)  | ATG AGA ACA CGA AGA TGG CAC CGA         | 60.4               |

pigments having peak wavelength of spectral sensitivities ( $\lambda_{\max}$ ) at 430 nm and 510–530 nm (Horch et al., 2002). Finally, recent microspectrophotometric measurements from *U. tangeri*, *U. vomeris*, *U. pugnax* and *U. pugilator* showed only one visual pigment present in retinula cells 1–7 (R1–R7 out of a total of eight) with  $\lambda_{\max}$  ranging from 500–540 nm depending on the species (Jordao et al., 2007). The possibility of a different visual pigment in the eighth retinula cell (R8) was not ruled out since the small size of these cells precluded any measurements.

Thus, although behavioral studies tend to indicate color perception, these have only occasionally been corroborated by physiological evidence. This disparity may exist because electrophysiological and spectrophotometric measurements tend to be of poor quality in *Uca*. The poor quality is most likely due to the enormous amount of screening pigments, which serve several functions, including restricting stray light, meta-rhodopsin conversion and light adaptation (Eguchi and Waterman, 1967; Ribi, 1978; Stavenga, 1989). Such studies therefore often produce results that only weakly support one side or the other.

The minimum requirement for color vision is the expression of at least two active opsins of different spectral absorbance in at least two different members of the eight photoreceptor cells comprising an ommatidium (also called retinula cells R1–R8). The present study aims to identify the physiological substrate for color vision in fiddler crabs, if it exists. We avoid the problems associated with the screening pigments by using molecular biological techniques. We identified three distinct opsin transcripts (*UpRh1*, *UpRh2* and *UpRh3*) in the retinas of both male and female *U. pugilator* and found by *in situ* hybridization that all three opsins are expressed in all ommatidia. An ostensibly UV-sensitive opsin, *UpRh3*, was found in R8 and, of the remaining seven retinula cells, five were found to have *UpRh1* and three to have *UpRh2*, meaning there is coexpression of two of the opsins in a single retinula cell in each ommatidium.

## MATERIALS AND METHODS

### Animals

*Uca pugilator* (Bosc 1802) sand fiddler crabs were collected from Beaufort, NC, USA and maintained at room temperature in the laboratory (Cincinnati, OH, USA) in a tank containing soil from their native habitat. The enclosure was filled and emptied at six hour intervals with 20 parts per thousand salinity water (Instant Ocean, Spectrum Brands Inc., Alpharetta, GA, USA), thereby mimicking a 12 h circatidal cycle. Crabs were placed on a 12 h:12 h L:D cycle and fed pulverized fish food (Tetramin, Spectrum Brands Inc.).

### RNA isolation, cDNA synthesis and PCR amplification

Total RNA was extracted from the eyes of five *U. pugilator* male fiddler crabs using TRIzol reagent according to the manufacturer's protocol (Gibco BRL, Gaithersburg, MD, USA). Single-stranded

complementary DNA (cDNA) was synthesized from ~1 µg of total RNA using oligo(dT) primers provided with the Affinityscript QPCR cDNA synthesis kit (Stratagene, La Jolla, CA, USA). Synthesized cDNA was used in PCR reactions with degenerate primers F5 and R8 designed based on the conserved regions found in all arthropod opsins (Hariyama et al., 1993) (Table 1). Owing to the presence of excess amount of polysaccharides in the crustacean eye tissue, Plant RNA Isolation Aid (Applied Biosystems, Foster City, CA, USA) was used in every PCR reaction (1:10 dilution per reaction) to prevent PCR inhibition. PCR amplifications were typically performed in 25 µl reaction volumes consisting of: 2.5 µl PCR 10× buffer, 2.5 µl 25 mmol l<sup>-1</sup> MgCl<sub>2</sub>, 4 µl 10 mmol l<sup>-1</sup> dNTPs, 1 µl 100 µmol l<sup>-1</sup> forward primer, 1 µl 100 µmol l<sup>-1</sup> reverse primer, 0.5 µl *Taq* DNA polymerase (Takara Bio Inc., Madison, WI, USA), 1.5 µl cDNA, 2.5 µl Plant RNA Isolation Aid and 9.5 µl H<sub>2</sub>O. PCR conditions were as follows: 5 min of initial denaturation; 30 cycles of 1 min at 94°C, 1 min at 48–55°C (depending on the T<sub>m</sub> of the primer pair), and 1 min at 72°C; and a final extension of 5 min at 72°C. The PCR products were separated on a 1% agarose gel, fragments of appropriate length were gel extracted (QIAquick Gel Extraction Kit; QIAGEN, Valencia, CA, USA), and these were cloned into pGEM-T Easy (Promega, Madison, WI, USA). Samples were bi-directionally sequenced with vector primers SP6 and T7. These partial opsin sequences were then used to design additional degenerate and opsin specific primers as listed in Table 1 for 5' and 3' RACE reactions.

### 3' and 5' RACE reaction

To obtain full-length opsin sequences, the 3' and 5' ends of the opsin genes were amplified using RACE. For 3' RACE, cDNA was synthesized from ~1 µg of the total RNA as described above using the adapted oligo(dT) primer, Hybrid dT (Table 1). Adapter R primers (reverse complementary to the 5' end of the Hybrid dT) were used as reverse primers in conjunction with opsin-specific forward primer. 5' RACE reactions were performed from ~10 µg of total RNA according to the manufacturer's protocol with the Firstchoice RLM-RACE kit (Applied Biosystems) using opsin-specific reverse primers (*UpRh1* R1, *UpRh2* R1 and *UpRh3* R1) and kit-provided forward primers.

### Phylogenetic analysis

Full-length *U. pugilator* opsin cDNA sequences were translated 'in silico' and aligned using CLUSTALW [MEGA 4.0 software (Tamura et al., 2007)] with other arthropod opsin protein sequences obtained from GenBank (species and accession numbers listed in Table 2). A neighbor-joining algorithm (Saitou and Nei, 1987) with Poisson correction (Zuckercandl and Pauling, 1965) was used to construct an opsin tree, and bootstrapped by replicating 1000 times. Pairwise deletion algorithm was also used to eliminate any alignment gaps present in the sequence.

Table 2. Arthropod opsin protein sequences used in phylogenetic analysis

| Opsin class | Species                                   | Taxon       | GenBank accession no. | References                |
|-------------|-------------------------------------------|-------------|-----------------------|---------------------------|
| LW          | <i>Apis mellifera</i>                     | Insecta     | U26026                | Townson et al., 1998      |
|             | <i>Drosophila melanogaster</i> Rh1        | Insecta     | K02315                | Feiler et al., 1992       |
|             | <i>D. melanogaster</i> Rh2                | Insecta     | M12896                | Feiler et al., 1992       |
|             | <i>D. melanogaster</i> Rh6                | Insecta     | Z86118                | Salcedo et al., 1999      |
|             | <i>Limulus polyphemus</i> lateral eye     | Chelicerata | L03781                | Smith et al., 1993        |
|             | <i>L. polyphemus</i> ocelli               | Chelicerata | L03782                | Smith et al., 1993        |
|             | <i>Papilio xuthus</i> Rh1                 | Insecta     | AB007423              | Arikawa et al., 1987      |
|             | <i>P. xuthus</i> Rh2                      | Insecta     | AB007424              | Arikawa et al., 1987      |
|             | <i>P. xuthus</i> Rh3                      | Insecta     | AB007425              | Arikawa et al., 1987      |
|             | <i>Pieris rapae</i>                       | Insecta     | AB177984              | Ichikawa and Tateda, 1982 |
|             | <i>Schistocera gregaria</i>               | Insecta     | CAA56377              | Towner et al., 1997       |
|             | <i>Tribolium castaneum</i>                | Insecta     | XM_968054             | Jackowska et al., 2007    |
|             | <i>Thermonectus marmaratus</i> LW         | Insecta     | EU921225              | Maksimovic et al., 2009   |
|             | <i>Vanessa cardui</i>                     | Insecta     | AF385333              | Briscoe et al., 2003      |
| MW          | <i>Calliphora vicina</i> Rh1              | Insecta     | M58334                | Paul et al., 1986         |
|             | <i>D. melanogaster</i> Rh1                | Insecta     | K02315                | Feiler et al., 1992       |
|             | <i>D. melanogaster</i> Rh2                | Insecta     | M12896                | Feiler et al., 1992       |
|             | <i>Hemigrapsus sanguineus</i> Rh1         | Crustacea   | D50583                | Sakamoto et al., 1996     |
|             | <i>H. sanguineus</i> Rh2                  | Crustacea   | D50584                | Sakamoto et al., 1996     |
|             | <i>Portunus pelagicus</i>                 | Crustacea   | ABM74400              | Kuballa et al., 2007      |
|             | <i>Triops granarius</i> opsin1            | Crustacea   | BAG80976              | Kashiyama et al., 2009    |
|             | <i>T. granarius</i> opsin2                | Crustacea   | BAG80977              | Kashiyama et al., 2009    |
|             | <i>T. granarius</i> opsin4                | Crustacea   | BAG80979              | Kashiyama et al., 2009    |
|             | <i>T. granarius</i> opsin5                | Crustacea   | BAG80980              | Kashiyama et al., 2009    |
|             | <i>Triops longicaudatus</i> opsin1        | Crustacea   | BAG80981              | Kashiyama et al., 2009    |
|             | <i>T. longicaudatus</i> opsin2            | Crustacea   | BAG80982              | Kashiyama et al., 2009    |
|             | <i>Uca vomeris</i> 1                      | Crustacea   | GQ228846              | —                         |
|             | <i>U. vomeris</i> 2                       | Crustacea   | GQ228847              | —                         |
| SW          | <i>A. mellifera</i>                       | Insecta     | AF004169              | Townson et al., 1998      |
|             | <i>Acyrtosiphon pisum</i>                 | Insecta     | XP_001951588          | Pruitt et al., 2007       |
|             | <i>Bicyclus anynana</i>                   | Insecta     | AAL91507              | Vanhoutte et al., 2002    |
|             | <i>Bombus impatiens</i>                   | Insecta     | AAV67326              | Spaethe and Briscoe, 2005 |
|             | <i>Branchinella kugenumaensis</i> opsin 1 | Crustacea   | BAG80984              | Kashiyama et al., 2009    |
|             | <i>B. kugenumaensis</i> opsin 2           | Crustacea   | BAG80985              | Kashiyama et al., 2009    |
|             | <i>B. kugenumaensis</i> opsin 3           | Crustacea   | BAG80986              | Kashiyama et al., 2009    |
|             | <i>Camponotus abdominalis</i>             | Insecta     | AF042788              | Smith et al., 1997        |
|             | <i>Cataglyphis bombycinus</i>             | Insecta     | AF042787              | Smith et al., 1997        |
|             | <i>D. melanogaster</i> Rh3                | Insecta     | M17718                | Feiler et al., 1992       |
|             | <i>D. melanogaster</i> Rh4                | Insecta     | M17730                | Feiler et al., 1992       |
|             | <i>D. melanogaster</i> Rh5                | Insecta     | U67905                | Salcedo et al., 1999      |
|             | <i>Heliconius erato</i>                   | Insecta     | AAY16529              | Pohl et al., 2009         |
|             | <i>Manduca sexta</i>                      | Insecta     | L78081                | White et al., 1983        |
|             | <i>P. glaucus</i> Rh5                     | Insecta     | AF077191              | Briscoe et al., 2000      |
|             | <i>P. xuthus</i> Rh5                      | Insecta     | AB028218              | Arikawa et al., 1987      |
|             | <i>S. gregaria</i>                        | Insecta     | CAA56378              | Towner et al., 1997       |
|             | <i>T. castaneum</i>                       | Insecta     | XM_965251             | Jackowska et al., 2007    |
|             | <i>T. granarius</i> opsin3                | Crustacea   | BAG80978              | Kashiyama et al., 2009    |
|             | <i>T. longicaudatus</i> opsin3            | Crustacea   | BAG80983              | Kashiyama et al., 2009    |
|             | <i>T. marmaratus</i> UV I                 | Insecta     | EU921226              | Maksimovic et al., 2009   |
|             | <i>T. marmaratus</i> UVII                 | Insecta     | EU921227              | Maksimovic et al., 2009   |
|             | <i>V. cardui</i>                          | Insecta     | AF414074              | Briscoe et al., 2003      |

The  $\lambda_{\max}$  values used to classify the opsins were determined using electrophysiological measurements or predicted from molecular analysis.

#### Probe synthesis for *in situ* hybridizations

Riboprobes were generated from ~200bp present at unique 3' untranslated regions (3' UTR) or 5' ends of the coding region (Fig. 1). Appropriate fragments were PCR amplified, cloned into pGEM T-Easy (Promega, Madison, WI, USA), and digoxigenin- and fluorescein-labeled antisense and sense (control) riboprobes were synthesized using the SP6/T7 transcription kit (Roche Applied Science, Indianapolis, IN, USA). After riboprobe synthesis, the template DNA was degraded using 2 µl of DNase, provided in the kit, for 15 min at 37°C. Synthesized probes were stored in hybridization buffer [0.3 mmol l<sup>-1</sup> NaCl, 2.5 mmol l<sup>-1</sup> EDTA, 20 mmol l<sup>-1</sup> Tris-HCl (pH 8.0), 50% formamide, 10% dextran

sulfate, 100 mg ml<sup>-1</sup> yeast tRNA and 1× Denhardt's medium (Sakamoto et al., 1996)] at -80°C until further use.

#### Single *in situ* hybridization

Fiddler crabs (*U. pugilator*) were immobilized on ice and their eyes were dissected directly into RNA Later Solution (Applied Biosystems, Foster City, CA, USA). The eyes were then fixed with 4% paraformaldehyde in 1× phosphate-buffered saline (PBS; pH 7.4) at room temperature (RT) for 2 h. After fixation, the tissue was washed twice in 1× PBS for 15 min and dehydrated through an ethanol series. After two 1 h washes in xylene, the tissue was embedded in paraffin wax (Thermo Scientific, Wilmington, DE,

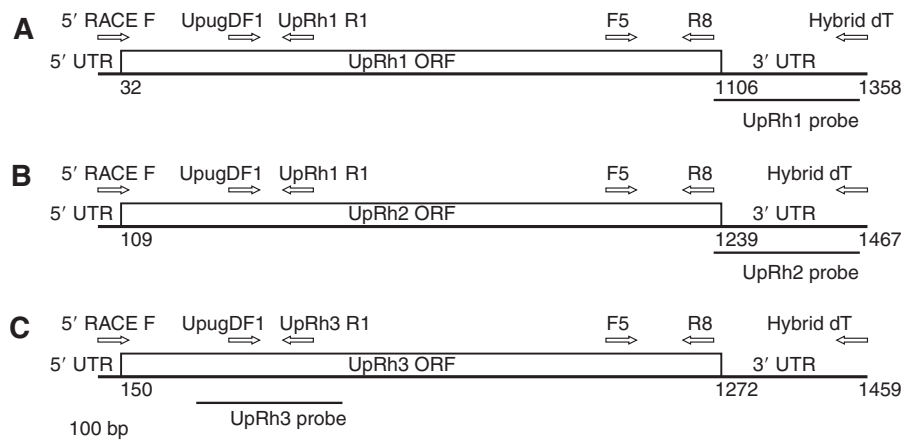

Fig. 1. Schematic of three opsin cDNA sequences identified from *U. pugnator* retina. (A) *UpRh1* cDNA, (B) *UpRh2* cDNA and (C) *UpRh3* cDNA. 5' and 3' untranslated regions (UTR) and the open reading frame (ORF) are indicated in the figure. The total length of the sequence and positions of the initiation and stop codons are also indicated. The location of the riboprobes synthesized for the *in situ* hybridizations are also shown with a line. Primers used to amplify the cDNA fragments are also shown.

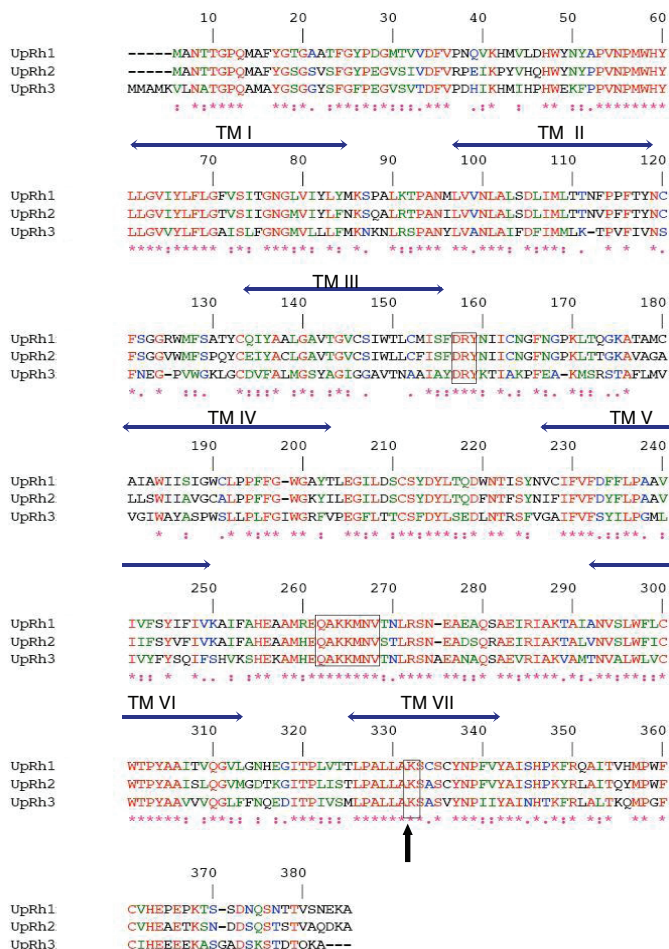

Fig. 2. Amino acid alignment of translated cDNA opsin sequences identified from *U. pugnator* using CLUSTALW. Predicted transmembrane domains of all three opsins are indicated by double-headed arrows. The conserved lysine involved in the Schiff's base linkage from the chromophore molecule is denoted with an arrow. Other possible conserved functional amino acids are boxed and the identical amino acids are indicated in red (and \* below), strongly similar amino acids in green (:) and the weakly similar amino acids in blue (.).

USA). The embedded tissue was frozen at  $-20^{\circ}\text{C}$  overnight, and  $\sim 10\mu\text{m}$  paraffin sections were cut using a microtome (Leitz Wetzlar, Wetzlar, Hesse, Germany). Sections were then washed once in  $1\times$  PBS for 10 min, rehydrated in a graded ethanol series to remove the paraffin wax, and hybridized with  $0.5\mu\text{gml}^{-1}$  of digoxigenin-labeled probe at  $55-60^{\circ}\text{C}$  for 18 h in hybridization buffer. After hybridization, the slides were washed at  $55-60^{\circ}\text{C}$  with  $5\times$  SSC, followed by sequential 30-min washes of  $2\times$ ,  $1\times$  and  $0.2\times$  SSC buffer. Sections were then blocked with 10% normal sheep serum (Jackson ImmunoResearch Laboratories Inc., West Grove, PA, USA) in  $1\times$  PBX for 1 h at RT, incubated at  $4^{\circ}\text{C}$  overnight with a 1:250 dilution of sheep anti-digoxigenin-AP (Roche Applied Sciences, Indianapolis, IN, USA) in blocking solution, and then washed three times in  $1\times$  PBX at RT for 20 min. Alkaline phosphate (AP) staining was developed using either the 1-STEP NBT/BCIP plus suppressor (Thermo Scientific, Wilmington, DE, USA) or with Fast Red tablets (Roche Applied Sciences, Indianapolis, IN, USA) according to manufacturer's instructions. After staining, the sections were washed twice for 10 min in  $1\times$  PBX at RT, rinsed with distilled  $\text{H}_2\text{O}$  and mounted using Fluoromount-G (SouthernBiotech, Birmingham, AL, USA). Images were digitally captured using an Olympus BX51 microscope equipped with an Olympus 60806 camera (Olympus America Inc., Center Valley, PA, USA) and processed with the Adobe Photoshop image processing software (Adobe Systems Inc., San Jose, CA, USA). Fluorescent images were captured with a Texas Red filter channel.

#### Double *in situ* hybridization

Double *in situ* hybridizations were performed as described above with minor modifications. Two different  $0.5\mu\text{gml}^{-1}$  riboprobes labeled with digoxigenin and fluorescein, respectively, were used simultaneously in the hybridization buffer. Sections were blocked in a mixture of 10% normal sheep serum and 10% normal goat serum (Jackson ImmunoResearch) and tissue sections were simultaneously incubated at  $4^{\circ}\text{C}$  for 18 h with both sheep anti-digoxigenin-AP (1:250) and goat anti-fluorescein-POD (1:100; Roche Applied Sciences, Indianapolis, IN, USA) diluted in blocking solution. A fluorescein-labeled probe was detected using a DAB substrate kit (Vector Laboratories, Burlingame, CA, USA) according to manufacturer's instructions. Alkaline phosphatase activity was

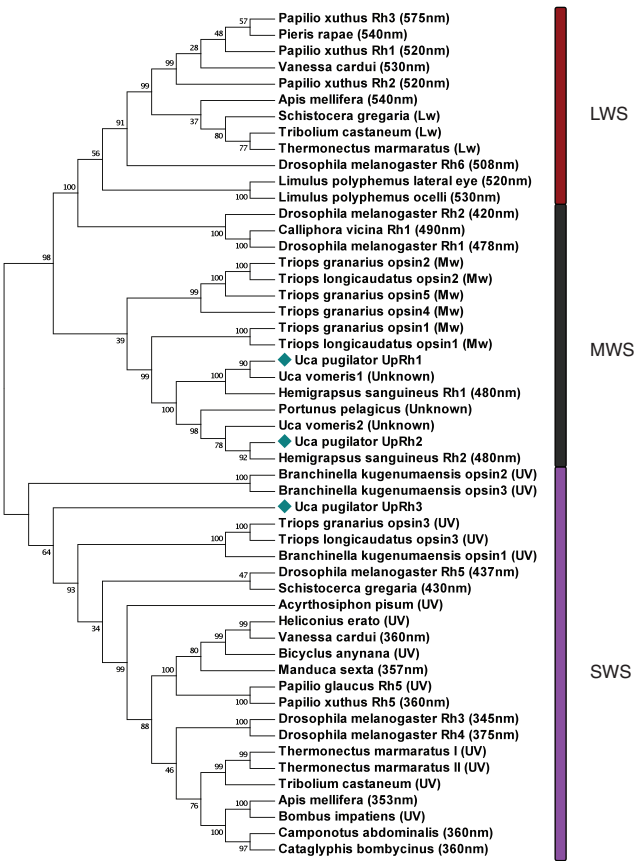

Fig. 3. Phylogenetic relationships of *U. pugilator* opsins with other known arthropod opsins. The *U. pugilator* opsins are highlighted with a colored diamond in the node. Numbers on top of each node indicates the bootstrap values of 1000 replications. The peak spectral absorption values are indicated within parentheses. For the accession numbers and citations for the opsin sequences used in the phylogenetic tree construction see Table 2. LWS, long-wavelength sensitive; MWS, middle-wavelength sensitive; SWS, short-wavelength sensitive.

subsequently detected using Fast Red tablets (Roche Applied Sciences) in accordance with manufacturer instructions after a brief 10 min wash in 1× PBX at RT.

## RESULTS

### Identification of opsin genes from *U. pugilator*

Three different opsin cDNAs of 1358, 1467 and 1459 bp were identified by RT-PCR using degenerate and gene-specific opsin primers (Table 1) and named *UpRh1*, *UpRh2* and *UpRh3*, respectively (Fig. 1; GenBank accession numbers: *UpRh1*, HM765425; *UpRh2*, HM765426; *UpRh3*, HM765427). Opsin cDNAs differed in the length of their 5' and 3' untranslated regions and in nucleotide sequence conservation, with the 3' end of each transcript in particular showing low (28%) sequence similarity.

Opsin amino acid sequences were deduced from the full-length cDNA sequences for each opsin. *UpRh1* and *UpRh2* each encode 377 amino acid opsins and *UpRh3* encodes a 376 amino acid opsin. *UpRh1* and *UpRh2* are 76.72% identical and 89.12% similar in their amino acid sequences, and show 50.13% amino acid identity and 70.13% similarity to *UpRh3*. As is typical for opsins, all three *U. pugilator* opsins are predicted to be seven-transmembrane-domain proteins. In addition they show strict conservation of (1) the

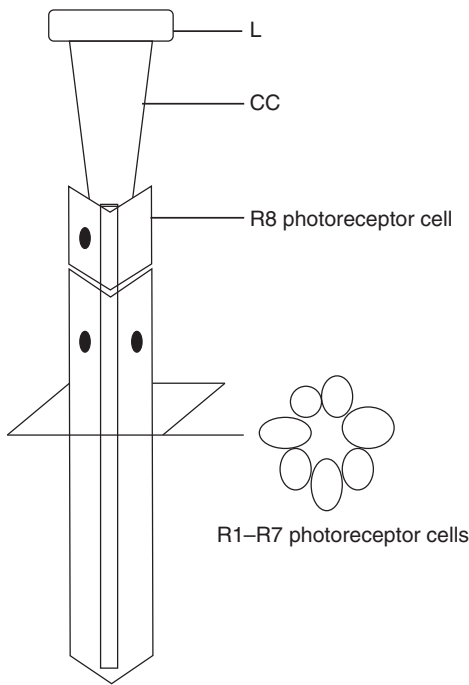

Fig. 4. Schematic of an ommatidium in *U. pugilator*. The lens (L), crystalline cone (CC) and photoreceptor cell (R1–R8) regions are indicated, with the eighth cell located distal to cells R1–R7. A cross section of the ommatidium indicates the arrangement of R1–R7.

potential G-protein binding regions (QAKKMNV and DRY) (Gartner and Towner, 1995; Townson et al., 1998), (2) the lysine (K) amino acid responsible for covalent binding to the chromophore through a Schiff's base interaction (Gartner and Towner, 1995; Townson et al., 1998; Wang et al., 1980), (3) two conserved cysteine (C) residues (*UpRh1*, C128 and C205; *UpRh2*, C128 and C205; *UpRh3*, C132 and C209) responsible for disulfide linkage stabilization (Gartner and Towner, 1995; Townson et al., 1998) and (4) an asparagine (N) that is a potential glycosylation site (*UpRh1* and *UpRh2*, N3; *UpRh3*, N9) (Gartner and Towner, 1995; Townson et al., 1998).

Several characteristic amino acids have been identified at specific positions that are functionally related to the spectral sensitivity of the opsins. For instance, a functional, conserved residue at position 131 in the third transmembrane domain of invertebrate opsins is thought to be one of the two negative counter ions stabilizing the protonated Schiff's base (Chang et al., 1995), and in all long-wavelength-sensitive opsins, this residue is a tyrosine (Y), whereas in all short-wavelength opsins, this residue is phenylalanine (F). *UpRh1* and *UpRh2* contain a tyrosine residue (Y131 and Y131) whereas *UpRh3* has a phenylalanine (F134; Fig. 2) residue corresponding to that position. *UpRh3* also contains a conserved lysine (K111) that is unique to all insect short-wavelength opsins. In contrast, *UpRh1* and *UpRh2* have a conserved serine (S142) found in all opsins except the short-wavelength opsins (Fig. 2). Together, these data predict that *UpRh1* and *UpRh2* are long-wavelength-sensitive opsins, and *UpRh3* is a short-wavelength-sensitive opsin.

To further test these predictions, we determined the phylogenetic relationships of the *U. pugilator* opsins to other arthropod opsins of known sensitivity (Fig. 3). *UpRh1* and *UpRh2* are nested within the middle-wavelength opsins. In particular, *UpRh1* is 91% identical

to *U. vomeris* opsin1 and 84% identical to *H. sanguineus* BCRH1 opsin, the latter has an estimated maxima at 480nm (Sakamoto et al., 1996). UpRh2 is 87% identical to *U. vomeris* opsin2 and 91% identical to *H. sanguineus* BCRH2 opsin, also sensitive to light at 480nm (Sakamoto et al., 1996). UpRh3, by contrast, is only 50% identical to the opsins identified from *U. vomeris* and *H. sanguineus*. It is more closely related to short-wavelength opsins (SW), with 71% similarity to ultraviolet-sensitive opsins from *B. impatiens* (absorption maxima unknown) and *A. mellifera* (absorption max. 353nm), respectively.

#### Expression of *U. pugilator* opsins in the photoreceptor cells

The retina of *U. pugilator* contains ~8000 nearly identical subunits called ommatidia (Smolka and Hemmi, 2009), each containing eight photoreceptor cells whose microvilli make up a fused rhabdom. In brachyurans, one of these photoreceptors is small and is situated at the distal ends of the cell bodies of the remaining seven photoreceptors. The rhabdomere of this small retinula cell, R8, is found only at the distal tip of the rhabdom in every ommatidium (Marshall et al., 1999). The remaining seven photoreceptors in *U. pugilator* have different sized and shaped cell bodies (Fig. 4). To determine the expression patterns of the *U. pugilator* opsin genes, we performed *in situ* hybridizations on wax sections of randomly oriented eyes. Antisense riboprobes were synthesized from regions with high nucleotide sequence specificity for each opsin to identify transcript-specific expression. No staining was detectable with the sense riboprobes (data not shown).

The mRNAs for all three *U. pugilator* opsin genes are present in every ommatidium in the eye, with no apparent spatial differences between ommatidia from different eye regions. However, opsin-specific differences in expression were observed between photoreceptor cells within individual ommatidia. *UpRh3*, for instance, was restricted to the small R8 cell at the distal end of the photoreceptor portion of each ommatidium (Fig. 5), whereas the putative middle-wavelength opsins are present in the proximal cells R1–R7. *UpRh1* mRNA was found in five of these seven cells (Fig. 6), and *UpRh2* mRNA was found in three of these cells (Fig. 7).

#### Coexpression of middle-wavelength-sensitive opsins in a subset of photoreceptors in the proximal retina

Since seven retinula cells form the proximal ommatidia, our observation that *UpRh1* and *UpRh2* were expressed in five and three proximal photoreceptors respectively indicates that these genes must be coexpressed in one of the retinula cells. To better define the expression patterns of these related genes, we performed double *in situ* hybridization. The results confirmed those from single *in situ* hybridization, that these two genes share overlapping expression in one of the seven proximal photoreceptor cells (Fig. 8). Fig. 8A shows seven photoreceptor cells, five of which express *UpRh1* and three express *UpRh2*. Expression patterns of mRNA for the latter three using a riboprobe specific to *UpRh2* show that in a single ommatidium only these three photoreceptor cells express *UpRh2* (Fig. 8B). Comparison of several such image pairs indicates coexpression of *UpRh1* and *UpRh2* opsins in a single photoreceptor cell.

#### DISCUSSION

Three sequentially distinct, full-length cDNAs of opsin genes were identified from *U. pugilator* retinas. By molecular analysis, *UpRh1* and *UpRh2* are predicted to be middle-wavelength sensitive, and *UpRh3* is predicted to be short-wavelength sensitive. These data are consistent with previous behavioral tests and the physiological tests

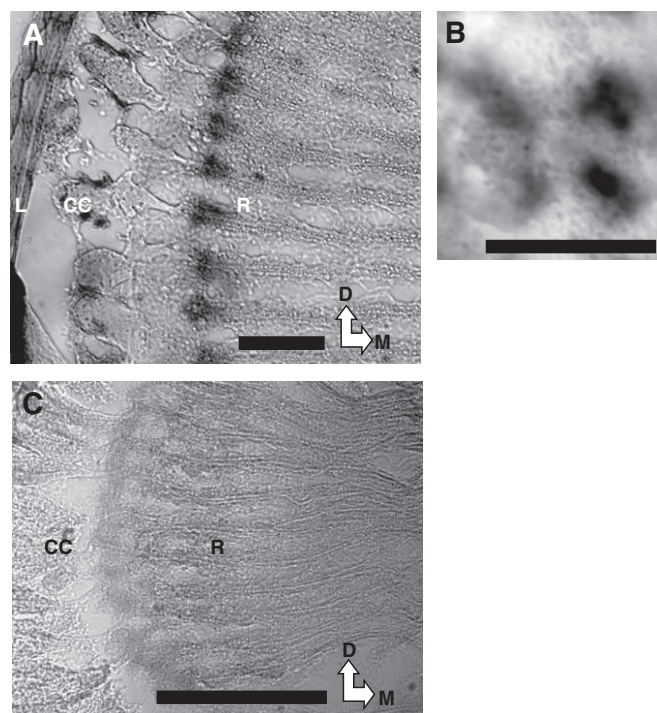

Fig. 5. Expression pattern of *UpRh3* mRNA as determined by *in situ* hybridization. (A) A sagittal view of many ommatidia. Note that *UpRh3* mRNA is present in only a single cell at the distal part of the ommatidium. Scale bar: 50  $\mu$ m. (B) A cross-section of an ommatidium in which a single four-lobed photoreceptor cell is seen at the distal tip of the ommatidium (R8 cell). Scale bar: 10  $\mu$ m. (C) A sagittal view of many ommatidia stained with the *UpRh3* sense probe as control. No clear staining pattern is seen in any of the ommatidium. Scale bar: 100  $\mu$ m. CC, Crystalline cone; D, dorsal; L, lens; M, medial; R, photoreceptor cells.

of Hyatt (Hyatt, 1974) and Horch et al. (Horch et al., 2002). The uniform expression pattern in ommatidia across the retina would seem to indicate a similarly uniform sensing capacity, but detailed studies on the physiological effect of screening pigments, and sensitizing pigments, if there are any, are required to determine whether there is any physiological heterogeneity between ommatidia.

#### Spatial distribution of *U. pugilator* opsins

The results from *in situ* hybridization show that all ommatidia of *U. pugilator* are composed of at least four types of photoreceptor cells that are unique in their spectral sensitivity, thereby satisfying the most fundamental requirement for color vision. This uniform expression pattern is somewhat surprising, since the dorsal and ventral visual fields of semi-terrestrial crabs are probably as consistently exposed to different light environments as any terrestrial animal, because of a highly efficient multi-sensory control system for maintaining eyestalk pitch and roll (Nalbach et al., 1989a; Nalbach et al., 1989b; Nalbach, 1990). However, with only three opsin genes, color vision in all directions probably requires such uniformity of expression. In addition to color discrimination, polarization sensitivity is common in several marine organisms, and its role is similar to color vision in enhancing contrast and conspicuousness, intraspecific signaling, and object identification (Cronin et al., 2003; Glantz and Schroeter, 2006; Glantz, 2008). In fiddler crabs, polarization sensitivity can apparently be used as a celestial direction cue for orienting to the

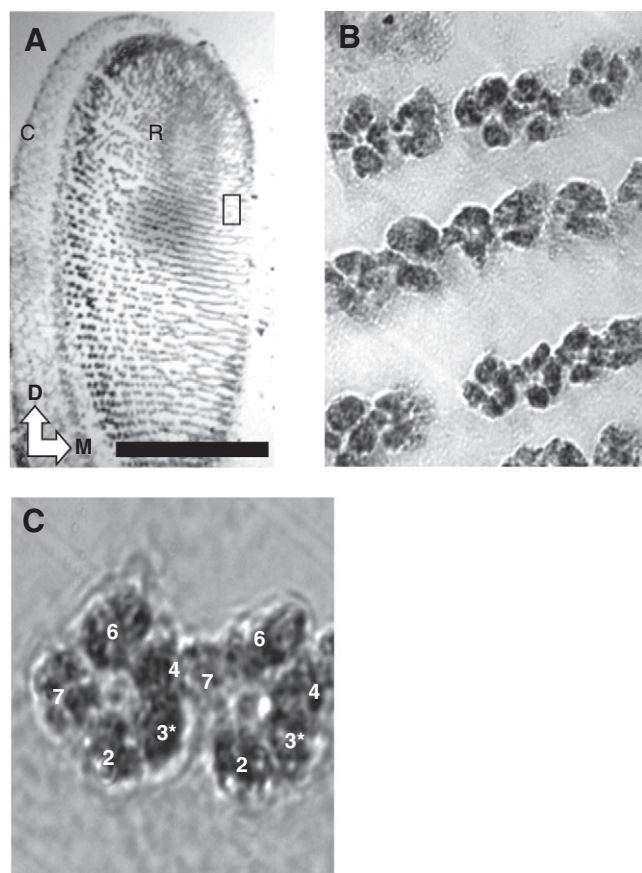

Fig. 6. Expression patterns of *UpRh1* mRNA as revealed by *in situ* hybridization. (A) Uniform expression of *UpRh1* can be seen throughout the retina (R) using Fast Red. C, cone; D, dorsal; M, medial. Scale bar: 500  $\mu$ m. (B) Enlargement of the boxed region in A. (C) A cross-sectional view of two ommatidia in which expression of *UpRh1* mRNA is present in five of the seven photoreceptor cells (R1–R7), as indicated by the numbers on the two ommatidia. The asterisk indicates the photoreceptor cell that shows coexpression of opsins.

crabs' home beach (Herrnkind, 1968; Chiussi and Diaz, 2002), although it appears to play no role in finer-scale navigation by path integration (Layne et al., 2003). Typically in insects, the dorsal rim area contains UV-sensitive photoreceptors which are also polarization sensitive, coinciding with the fact that natural light tends to be more polarized at shorter wavelengths. *UpRh3*, the opsin in the most distal cell in each ommatidium, is UV-sensitive and may likewise mediate polarization sensitivity, but this must be done in conjunction with at least one other cell, normally within

the same ommatidium. Since the other cells in the ommatidium are not UV sensitive, there is potential for confounding the e-vector orientation and wavelength.

#### Expansion of ancestral middle-wavelength-sensitive opsin

Based on their peak sensitivity to light, opsins are often classified into three groups: short-wavelength-sensitive opsins (SWS, ultraviolet–blue), middle-wavelength-sensitive (MWS, blue–green) and long-wavelength-sensitive (LWS, green–red). It is thought that the visual system of ancestral insects was trichromatic, with opsins sensitive to UV, blue and green (Briscoe and Chittka, 2001), and in some groups an expansion of the green opsin added red sensitivity, followed by the loss of the blue opsin (Jackowska et al., 2007). Although much less is known of the molecular evolution of crustaceans, crabs do not appear to follow this scheme. They are thought to descend from ancestors with two opsins, one sensitive to violet–ultraviolet, and the other sensitive to blue–green or green (Porter et al., 2007). Among the three opsins identified from the photoreceptor cells of *U. pugilator*, *UpRh3* is predicted to be UV sensitive, and *UpRh1* and *UpRh2* to be MW sensitive. Although most other crustaceans possess an opsin sensitive to considerably longer wavelengths (~500–530 nm), the only brachyuran crab whose opsin gene sequence and spectral sensitivity are both known, *Hemigrapsus sanguineus*, has two MWS opsins, both with peak sensitivity around 480 nm (Sakamoto et al., 1996). The highly similar fiddler crab opsins *UpRh1* and *UpRh2* can be predicted to have a similar peak, and are likely to be the result of an expansion event of the ancestral MWS opsin. The functional significance of this ostensible bifurcation of the MWS opsin as an adaptation in the color system of semi-terrestrial animals should be further examined in the context of their particular light environment.

#### Coexpression of opsins in a single photoreceptor cell

The results from the double *in situ* hybridization reveal that the probes for the two opsins, *UpRh1* and *UpRh2*, both label a single photoreceptor cell in each ommatidium. The colocalization of these two probes in a single photoreceptor cell demonstrates that the cell expresses two opsin visual pigments. The once commonly held notion that a single photoreceptor cell expresses only one functional visual pigment has been dispelled many times over, as evidence from both vertebrates and invertebrates has shown this to be an over-generalization. The expression of multiple opsins in a single photoreceptor cell has been reported in mice (Applebury et al., 2000; Lukats et al., 2002; Lyubarski et al., 1999), hamsters (Lukats et al., 2002), rabbits and guinea pigs (Röhlich et al., 1994), fish (Archer and Lythgoe, 1990; Wood and Partridge, 1993; Hope et al., 1998), salamanders (Makino and Dodd, 1996), butterflies (Kitamoto et al., 1998; Arikawa et al., 2003; Sison-Mangus et al., 2006), flies (Mazzoni et al., 2008), beetles (Jackowska et al., 2007), and several

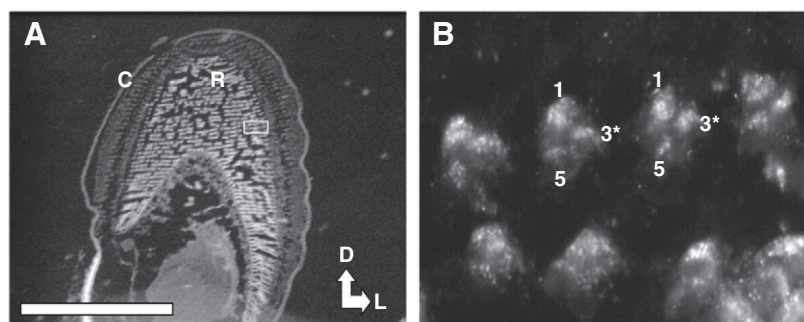

Fig. 7. Expression patterns of *UpRh2* mRNA as revealed by *in situ* hybridization. (A) Uniform expression of *UpRh2* can be seen throughout the retina using Fast Red fluorescence imaging. Scale bar: 500  $\mu$ m. (B) Enlargement of the boxed region in A showing a cross-sectional view of ommatidia in which expression of *UpRh2* mRNA is present in three of the seven photoreceptor cells (R1–R7), as indicated by the numbers on the two ommatidia. C, cone; D, dorsal; L, lateral; R, photoreceptor cells.

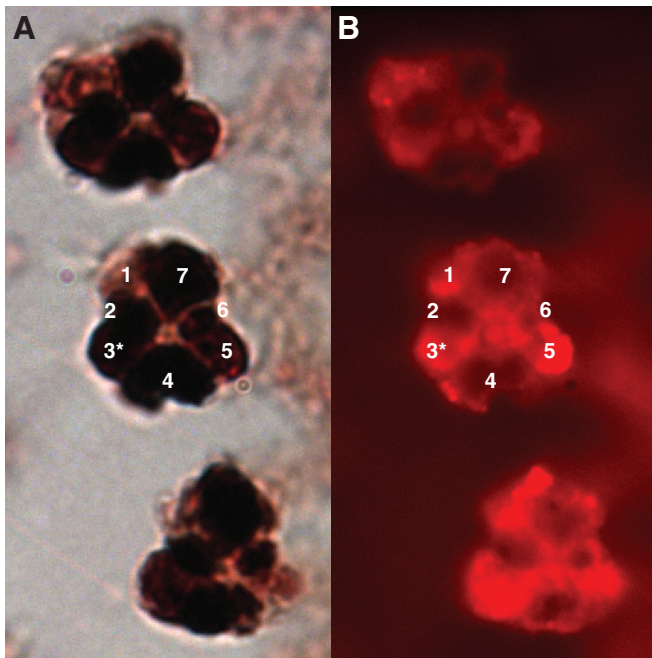

Fig. 8. Distribution of *UpRh1* and *UpRh2* mRNA as revealed by *in situ* hybridization. (A) Double colorimetric staining of ommatidia with riboprobes specific to *UpRh1* (black) and *UpRh2* (red). (B) Fluorescent staining of the same ommatidia with Fast Red specific to *UpRh2*. Note that *UpRh2* mRNA is present in only three cells. The numbers on the ommatidium indicate the seven photoreceptor cells (R1–R7) as seen from a cross-sectional view. The asterisk indicates the photoreceptor cell that is labeled by both the opsin probes.

distantly related crustaceans (Sakamoto et al., 1996; Oakley and Huber, 2004; Frank et al., 2009). In fact, coexpression of opsins in single photoreceptors may even be unusually common in crustaceans (Cronin and Porter, 2008).

The coexpression of opsins now seems to be a fairly common phenomenon, but its functional significance is still a matter of speculation, although at least two reasonable theories exist. The first theory proposes a sensitivity enhancement function, and no role in color vision. Multiple opsin expression causes photoreceptor cells to have a broader spectral sensitivity and, presumably, increases the absolute sensitivity of the cell. These cells may therefore mediate achromatic vision in diurnal invertebrates under low light conditions, similar to rods in vertebrate scotopic vision, a function that has also been proposed for opsin coexpression in murine cones (Applebury et al., 2000). The second theory proposes a role in color vision. If the absorbance spectra of solo-expressed visual pigments are fairly similar, a 'broad-band' cell may be useful for spectral tuning. The two similar signals can be better discriminated by sharpening and amplifying their peaks, essentially by multiplication of the signal from the broad-band cell with the respective single peak signals, thereby providing the animal with finer color discrimination. A variation of this theory that does not strictly involve color perception is that the activity of a broad-spectrum photoreceptor is compared to that of a narrower UV photoreceptor to judge the ratio between UV and all longer wavelengths, which may be useful for orientation (Mazzoni et al., 2008). Although the specific absorbance curves to support this theory have yet to be demonstrated, we speculate that, of the two theories, the opsins expressed in *U. pugnator* conform better to the

latter, color perception theory. Unlike, for instance, lycaenid butterflies which have a photoreceptor type coexpressing both a short and a long-wavelength opsin, probably conferring an extremely broad-sensitivity spectrum (Sison-Mangus et al., 2006), the two coexpressed opsins in fiddler crabs fall within the same spectral class. This means that the broadness of their combined spectral absorbance is narrower than it potentially could be, limiting its effectiveness for improving absolute sensitivity and potentially introducing an additional need for signal sharpening.

## ACKNOWLEDGEMENTS

We would like to thank Dr Dan Rittschof for providing us with the experimental animals, Dr Elke Buschbeck for kindly allowing us to use her lab equipment and Dr Srdjan Maksimovic and Mark Charlton-Perkins for their technical assistance and helpful discussions. This research work was funded by a University Research Council Fellowship and Wieman/Wendel/Benedict Research Grant to P.R. and by NSF (IOS 0749768) to J.E.L.

## REFERENCES

- Applebury, M. L., Antoch, M. P., Baxter, L. C., Chun, L. L. Y., Falk, J. D., Farhangfar, F., Kage, K., Krzystolik, M. G., Lyass, L. A. and Robbins, J. T. (2000). The murine cone photoreceptor: a single cone type expresses both S and M opsins with retinal spatial patterning. *Neuron* **27**, 513–523.
- Archer, S. N. and Lythgoe, J. N. (1990). The visual pigment basis for cone polymorphism in the guppy, *Poecilia reticulata*. *Vision Res.* **30**, 225–233.
- Arikawa, K., Inokuma, K. and Eguchi, E. (1987). Pentachromatic visual system in a butterfly. *Naturwissenschaften* **74**, 297–298.
- Arikawa, K., Mizuno, S., Kinoshita, M. and Stavenga, D. G. (2003). Coexpression of two visual pigments in a photoreceptor causes an abnormally broad spectral sensitivity in the eye of the butterfly *Papilio xuthus*. *J. Neurosci.* **23**, 4527–4532.
- Aspey, W. P. (1971). Inter-species sexual discrimination and approach-avoidance conflict in two species of fiddler crabs, *Uca pugnax* and *Uca pugnator*. *Anim. Behav.* **19**, 669–676.
- Backwell, P. R. Y. and Passmore, N. I. (1996). Time constraints and multiple choice criteria in the sampling behaviour and mate choice of the fiddler crab, *Uca annulipes*. *Behav. Ecol. Sociobiol.* **38**, 407–416.
- Backwell, P. R. Y., Jennions, M. D., Christy, J. H. and Passmore, N. I. (1999). Female choice in the synchronously waving fiddler crab *Uca annulipes*. *Ethol.* **105**, 415–421.
- Backwell, P. R. Y., Christy, J. H., Telford, S. R., Jennions, M. D. and Passmore, N. I. (2000). Dishonest signalling in a fiddler crab. *Proc. Biol. Sci.* **267**, 719–724.
- Baldwin, J. and Johnsen, S. (2009). The importance of color in mate choice of the blue crab *Callinectes sapidus*. *J. Exp. Biol.* **212**, 3762–3768.
- Bosc, L. A. G. (1802). Histoire naturelle des crustacés. In *Histoire Naturelle de Buffon*. Paris: R. R. Castel.
- Briscoe, A. D. (2000). Six opsins from the butterfly *Papilio glaucus*: molecular phylogenetic evidence for paralogous origins of red-sensitive visual pigments in insects. *J. Mol. Evol.* **51**, 110–121.
- Briscoe, A. D. and Chittka, L. (2001). The evolution of color vision in insects. *Annu. Rev. Entomol.* **46**, 471–510.
- Briscoe, A. D., Bernard, G. D., Szeto, A. S., Nagy, L. M. and White, R. H. (2003). Not all butterfly eyes are created equal: rhodopsin absorption spectra, molecular identification, and localization of ultraviolet-, blue-, and green-sensitive rhodopsin-encoding mRNAs in the retina of *Vanessa cardui*. *J. Comp. Neurol.* **458**, 334–349.
- Chang, B. S. W., Crandall, K. A., Carulli, J. P. and Hartl, D. L. (1995). Opsin phylogeny and evolution: a model for blue shifts in wavelength regulation. *Mol. Phylog. Evol.* **4**, 31–43.
- Cheroske, A. G., Cronin, T. W., Durham, M. F. and Caldwell, R. L. (2009). Adaptive signaling behavior in stomatopods under varying light conditions. *Mar. Freshw. Behav. Physiol.* **42**, 219–232.
- Chiussi, R. and Diaz, H. (2002). Orientation of the fiddler crab, *Uca cumulanta*: responses to chemical and visual cues. *J. Chem. Ecol.* **28**, 1787–1796.
- Christy, J. H. and Backwell, P. R. Y. (2006). No preference for exaggerated courtship signals in a sensory trap. *Anim. Behav.* **71**, 1239–1246.
- Christy, J. H. and Salmon, M. (1984). Ecology and evolution of mating systems of fiddler crabs (genus *Uca*). *Biological Rev.* **59**, 483–509.
- Christy, J. H. and Salmon, M. (1991). Comparative studies of reproductive behavior in mantis shrimps and fiddler crabs. *Amer. Zool.* **31**, 329–337.
- Christy, J. H., Backwell, P. R. Y. and Goshima, S. (2001). The design and production of a sexual signal: hoods and hood building by male fiddler crabs *Uca musica*. *Behav.* **138**, 1065–1083.
- Crane, J. (1975). *Fiddler Crabs of the World* (Ocypodidae: genus *Uca*). New Jersey: Princeton University Press.
- Cronin, T. and Porter, M. (2008). Exceptional variation on a common theme: the evolution of crustacean compound eyes. *Evo. Edu. Outreach* **1**, 463–475.
- Cronin, T. W., Shashar, N., Caldwell, R. L., Marshall, J., Cheroske, A. G. and Chiou, T. H. (2003). Polarization vision and its role in biological signaling. *Integr. Comp. Biol.* **43**, 549–558.
- Darwin, C. (1871). *The Descent of Man and Selection in Relation to Sex*. New Jersey: Princeton University Press.
- Detto, T. (2007). The fiddler crab *Uca mjoebergi* uses colour vision in mate choice. *Proc. R. Soc. Lond. B Biol. Sci.* **274**, 2785–2790.
- Detto, T. and Backwell, P. R. Y. (2009). The fiddler crab *Uca mjoebergi* uses ultraviolet cues in mate choice but not aggressive interactions. *Anim. Behav.* **78**, 407–411.

- Detto, T., Backwell, P. R., Hemmi, J. M. and Zeil, J. (2006). Visually mediated species and neighbour recognition in fiddler crabs (*Uca mjoebergi* and *Uca capricornis*). *Proc. R. Soc. Lond. B Biol. Sci.* **273**, 1661-1666.
- Eguchi, E. and Waterman, T. H. (1967). Changes in retinal fine structure induced in the crab *Libinia* by light and dark adaptation. *Cell Tissue Res.* **79**, 209-229.
- Feiler, R., Bjornson, R., Kirschfeld, K., Mismar, D., Rubin, G., Smith, D., Socolich, M. and Zuker, C. (1992). Ectopic expression of ultraviolet-rhodopsins in the blue photoreceptor cells of *Drosophila*: visual physiology and photochemistry of transgenic animals. *J. Neurosci.* **12**, 3862-3868.
- Fernandez, A. A. and Morris, M. R. (2007). Sexual selection and trichromatic color vision in primates: statistical support for the preexisting-bias hypothesis. *Am. Nat.* **170**, 10-20.
- Frank, T. M., Porter, M. and Cronin, T. W. (2009). Spectral sensitivity, visual pigments and screening pigments in two life history stages of the ontogenetic migrator *Gnathopausia ingens*. *J. Mar. Biol. Assoc. UK* **89**, 119-129.
- Gartner, W. and Towner, P. (1995). Invertebrate visual pigments. *Photochem. Photobiol.* **62**, 1-16.
- Glantz, R. (2008). Polarization vision in crayfish motion detectors. *J. Comp. Physiol. A* **194**, 565-575.
- Glantz, R. and Schroeter, J. (2006). Polarization contrast and motion detection. *J. Comp. Physiol. A* **192**, 905-914.
- Hariyama, T., Ozaki, K., Tokunaga, F. and Tsukahara, Y. (1993). Primary structure of crayfish visual pigment deduced from cDNA. *FEBS Lett.* **315**, 287-292.
- Herrnkind, W. F. (1968). Adaptive visually-directed orientation in *Uca pugnator*. *Amer. Zool.* **8**, 585-598.
- Hope, A. J., Partridge, J. C. and Hayes, P. K. (1998). Switch in rod opsin gene expression in the European eel, *Anguilla anguilla*. *Proc. R. Soc. Lond. B Biol. Sci.* **265**, 869-874.
- Horch, K., Salmon, M. and Forward, R. (2002). Evidence for a two pigment visual system in the fiddler crab, *Uca thayeri*. *J. Comp. Physiol. A* **188**, 493-499.
- How, M. J., Hemmi, J. M., Zeil, J. and Peters, R. (2008). Claw waving display changes with receiver distance in fiddler crabs, *Uca perplexa*. *Anim. Behav.* **75**, 1015-1022.
- How, M. J., Zeil, J. and Hemmi, J. M. (2009). Variability of a dynamic visual signal: the fiddler crab claw-waving display. *J. Comp. Physiol. A* **195**, 55-67.
- Hyatt, G. W. (1974). Behavioural evidence for light intensity discrimination by the fiddler crab, *Uca pugnator* (Brachyura, Ocypodidae). *Anim. Behav.* **22**, 796-801.
- Ichikawa, T. and Tateda, H. (1982). Distribution of color receptors in the larval eyes of four species of lepidoptera. *J. Comp. Physiol. A* **149**, 317-324.
- Jackowska, M., Bao, R., Liu, Z., McDonald, E., Cook, T. and Friedrich, M. (2007). Genomic and gene regulatory signatures of cryptozoic adaptation: Loss of blue sensitive photoreceptors through expansion of long wavelength-opsin expression in the red flour beetle *Tribolium castaneum*. *Front. Zool.* **4**, 24.
- Jordao, J. M., Cronin, T. W. and Oliveira, R. F. (2007). Spectral sensitivity of four species of fiddler crabs (*Uca pugnax*, *Uca pugnator*, *Uca vomeris* and *Uca tangeri*) measured by *in situ* microspectrophotometry. *J. Exp. Biol.* **210**, 447-453.
- Kashiwaga, K., Seki, T., Numata, H. and Goto, S. G. (2009). Molecular characterization of visual pigments in branchiopoda and the evolution of opsins in arthropoda. *Mol. Biol. Evol.* **26**, 299-311.
- Kitamoto, J., Sakamoto, K., Ozaki, K., Mishina, Y. and Arikawa, K. (1998). Two visual pigments in a single photoreceptor cell: identification and histological localization of three mRNAs encoding visual pigment opsins in the retina of the butterfly *Papilio xuthus*. *J. Exp. Biol.* **201**, 1255-1261.
- Koga, T., Backwell, P. R. Y., Jennions, M. D. and Christy, J. H. (1998). Elevated predation risk changes mating behaviour and courtship in a fiddler crab. *Proc. R. Soc. Lond. B Biol. Sci.* **265**, 1385-1390.
- Kuballa, A., Merritt, D. and Elizur, A. (2007). Gene expression profiling of cuticular proteins across the moult cycle of the crab *Portunus pelagicus*. *BMC Biol.* **5**, 45.
- Layne, J. E., Barnes, W. P. and Duncan, M. J. (2003). Mechanisms of homing in the fiddler crab *Uca rapax* 2. Information sources and frame of reference for a path integration system. *J. Exp. Biol.* **206**, 4425-4442.
- Lim, M. L. M., Li, J. and Li, D. (2008). Effect of UV-reflecting markings on female mate-choice decisions in *Cosmophasis umbratica*, a jumping spider from Singapore. *Behav. Ecol.* **19**, 61-66.
- Lukats, A., Dkhissi-Benyahya, O., Szepessy, Z., Rohlich, P., Vigh, B., Bennett, N. C., Cooper, H. M. and Szel, A. (2002). Visual pigment coexpression in all cones of two rodents, the Siberian hamster, and the pouched mouse. *Invest. Ophthalmol. Vis. Sci.* **43**, 2468-2473.
- Lyubarsky, A. L., Falsini, B., Pennesi, M. E., Valentini, P. and Pugh, E. N. J. (1999). UV- and midwave-sensitive cone-driven retinal responses of the mouse: a possible phenotype for coexpression of cone photopigments. *J. Neurosci.* **19**, 442-455.
- Makino, C. L. and Dodd, R. L. (1996). Multiple visual pigments in a photoreceptor of the salamander retina. *J. Gen. Physiol.* **108**, 27-34.
- Maksimovic, S., Cook, T. A. and Buschbeck, E. K. (2009). Spatial distribution of opsin-encoding mRNAs in the tiered larval retinas of the sunburst diving beetle *Thermonectus marmoratus* (Coleoptera: Dytiscidae). *J. Exp. Biol.* **212**, 3781-3794.
- Marshall, J., Cronin, T. W., Shashar, N. and Land, M. (1999). Behavioural evidence for polarisation vision in stomatopods reveals a potential channel for communication. *Philos. Trans. R. Soc. Lond. B Biol. Sci.* **9**, 755-758.
- Mazzoni, E. O., Celik, A., Wernet, M. F., Vasiliauskas, D., Johnston, R. J., Cook, T. A., Pichaud, F. and Desplan, C. (2008). *Iroquois* complex genes induce co-expression of rhodopsins in *Drosophila*. *PLoS Biol.* **6**, 825-835.
- Murai, M. and Backwell, P. R. Y. (2005). More signalling for earlier mating: conspicuous male claw waving in the fiddler crab, *Uca perplexa*. *Anim. Behav.* **70**, 1093-1097.
- Naibach, H. O. (1990). Multisensory control of eyestalk orientation in decapod crustaceans: An ecological approach. *J. Crust. Biol.* **10**, 382-399.
- Naibach, H. O., Naibach, G. and Forzin, L. (1989a). Visual control of eye-stalk orientation in crabs: vertical optokinetics, visual fixation of the horizon, and eye design. *J. Comp. Physiol. A* **165**, 577-587.
- Naibach, H. O., Zeil, J. and Forzin, L. (1989b). Multisensory control of eye-stalk orientation in space: crabs from different habitats rely on different senses. *J. Comp. Physiol. A* **165**, 643-649.
- Oakley, T. H. and Huber, D. R. (2004). Differential expression of duplicated opsin genes in two eye types of ostracod crustaceans. *J. Mol. Evol.* **59**, 239-249.
- Paul, R., Steiner, A. and Gempferlein, R. (1986). Spectral sensitivity of *Calliphora erythrocephala* and other insect species studied with Fourier Interferometric Stimulation (FIS). *J. Comp. Physiol. A* **158**, 669-680.
- Pohl, N., Sison-Mangus, M., Yee, E., Liswi, S. and Briscoe, A. (2009). Impact of duplicate gene copies on phylogenetic analysis and divergence time estimates in butterflies. *BMC Evol. Biol.* **9**, 99.
- Porter, M. L., Cronin, T. W., McClellan, D. A. and Crandall, K. A. (2007). Molecular characterization of crustacean visual pigments and the evolution of pancrustacean opsins. *Mol. Biol. Evol.* **24**, 253-268.
- Pruitt, K. D., Tatusova, T. and Maglott, D. R. (2007). NCBI reference sequences (RefSeq): a curated non-redundant sequence database of genomes, transcripts and proteins. *Nucleic Acids Res.* **35**, 61-65.
- Ribi, W. (1978). Ultrastructure and migration of screening pigments in the retina of *Pieris rapae* (Lepidoptera, Pieridae). *Cell Tissue Res.* **191**, 57-73.
- Röhlich, P., van Veen, T. and Szel, A. (1994). Two different visual pigments in one retinal cone cell. *Neuron* **13**, 1159-1166.
- Saitou, N. and Nei, M. (1987). The neighbor-joining method: a new method for reconstructing phylogenetic trees. *Mol. Biol. Evol.* **4**, 406-425.
- Sakamoto, K., Hisatomi, O., Tokunaga, F. and Eguchi, E. (1996). Two opsins from the compound eye of the crab *Hemigrapsus sanguineus*. *J. Exp. Biol.* **199**, 441-448.
- Salcedo, E., Huber, A., Henrich, S., Chadwell, L. V., Chou, W.-H., Paulsen, R. and Britt, S. G. (1999). Blue- and green-absorbing visual pigments of *Drosophila*: ectopic expression and physiological characterization of the R8 photoreceptor cell-specific Rh5 and Rh6 rhodopsins. *J. Neurosci.* **19**, 10716-10726.
- Salmon, M. (1984). The courtship, aggregation and mating system of a primitive fiddler crab (*Uca vocans*: Ocypodidae). *Trans. Zool. Soc. Lond.* **37**, 1-50.
- Salmon, M. and Hyatt, G. W. (1983). Spatial and temporal aspects of reproduction in North Carolina fiddler crabs (*Uca pugnator* Bosc). *J. Exp. Mar. Biol. Ecol.* **70**, 21-43.
- Salmon, M. and Zucker, N. (1988). Interpreting differences in the reproductive behavior of fiddler crabs (genus *Uca*). In *Behavioral Adaptation to Intertidal Life* (ed. G. Chelazzi and M. Vannini). New York: Plenum Press.
- Scott, S. and Mote, M. I. (1974). Spectral sensitivity in some marine crustacea. *Vision Res.* **14**, 659-663.
- Seehausen, O., Terai, Y., Magalhaes, I. S., Carleton, K. L., Mrosso, H. D. J., Miyagi, R., van der Sluis, I., Schneider, M. V., Maan, M. E., Tachida, H. et al. (2008). Speciation through sensory drive in cichlid fish. *Nature* **455**, 620-626.
- Sison-Mangus, M. P., Bernard, G. D., Lampel, J. and Briscoe, A. D. (2006). Beauty in the eye of the beholder: the two blue opsins of lycaenid butterflies and the opsin gene-driven evolution of sexually dimorphic eyes. *J. Exp. Biol.* **209**, 3079-3090.
- Smith, W. C., Price, D. A., Greenberg, R. M. and Batelle, B. A. (1993). Opsins from the lateral eyes and ocelli of the horseshoe crab, *Limulus polyphemus*. *Proc. Natl. Acad. Sci.* **90**, 6150-6154.
- Smith, W., Ayers, D., Popp, M. and Hargrave, P. (1997). Short wavelength-sensitive opsins from the Saharan silver and carpenter ants. *Invert. Neurosci.* **3**, 49-56.
- Smolka, J. and Hemmi, J. M. (2009). Topography of vision and behaviour. *J. Exp. Biol.* **212**, 3522-3532.
- Spaethe, J. and Briscoe, A. D. (2005). Molecular characterization and expression of the UV opsin in bumblebees: three ommatidial subtypes in the retina and a new photoreceptor organ in the lamina. *J. Exp. Biol.* **208**, 2347-2361.
- Stavenga, D. G. (1989). Pigments in compound eyes. In *Facets of Vision* (ed. D. G. Stavenga and R. C. Hardie), pp. 152-172. Berlin, Heidelberg, New York, London, Paris, Tokyo: Springer-Verlag.
- Szatecsny, M., Strondi, C., Baierl, A., Ries, C. and Hodl, W. (2010). Chin up: are the bright throats of male common frogs a condition-independent visual cue? *Anim. Behav.* **79**, 779-786.
- Tamura, K., Dudley, J., Nei, M. and Kumar, S. (2007). MEGA4: molecular evolutionary genetics analysis (MEGA) software version 4.0. *Mol. Biol. Evol.* **24**, 1596-1599.
- Towner, P., Harris, P., Wolstenholme, A. J., Hill, C., Worm, K. and Gartner, W. (1997). Primary structure of locust opsins: a speculative model which may account for ultraviolet wavelength light detection. *Vision Res.* **37**, 495-503.
- Townson, S. M., Chang, B. S. W., Salcedo, E., Chadwell, L. V., Pierce, N. E. and Britt, S. G. (1998). Honeybee blue- and ultraviolet-sensitive opsins: cloning, heterologous expression in *Drosophila*, and physiological characterization. *J. Neurosci.* **18**, 2412-2422.
- Vanhoutte, K. J. A., Eggen, B. J. L., Janssen, J. J. M. and Stavenga, D. G. (2002). Opsin cDNA sequences of a UV and green rhodopsin of the satyrine butterfly *Bicyclus anynana*. *Insect Biochem. Mol. Biol.* **32**, 1383-1390.
- Wang, J. K., McDowell, J. H. and Hargrave, P. A. (1980). Site of attachment of 11-cis-retinal in bovine rhodopsin. *Biochemistry* **19**, 5111-5117.
- White, R. H., Banister, M. J. and Bennett, R. R. (1983). Spectral sensitivity of screening pigment migration in the compound eye of *Manduca sexta*. *J. Comp. Physiol. A* **153**, 59-66.
- Wood, P. and Partridge, J. C. (1993). Opsin substitution induced in retinal rods of the eel (*Anguilla anguilla*): a model for G-protein-linked receptors. *Proc. R. Soc. Lond. B Biol. Sci.* **254**, 227-232.
- Zeil, J. and Hemmi, J. M. (2006). The visual ecology of fiddler crabs. *J. Comp. Physiol. A* **192**, 1-25.
- Zeil, J. and Hofmann, M. (2001). Signals from 'crabworld': cuticular reflections in a fiddler crab colony. *J. Exp. Biol.* **204**, 2561-2569.
- Zeil, J. and Zanker, J. M. (1997). A glimpse into crabworld. *Vision Res.* **37**, 3417-3426.
- Zuckercandl, E. and Pauling, L. (1965). Evolutionary divergence and convergence in proteins. In *Evolving Genes and Proteins* (ed. V. Bryson and H. J. Vogel), pp. 97-165. New York: Academic Press.
